# Supplementary material
Source: PubMed Central journal article supplement (PMC4715262)

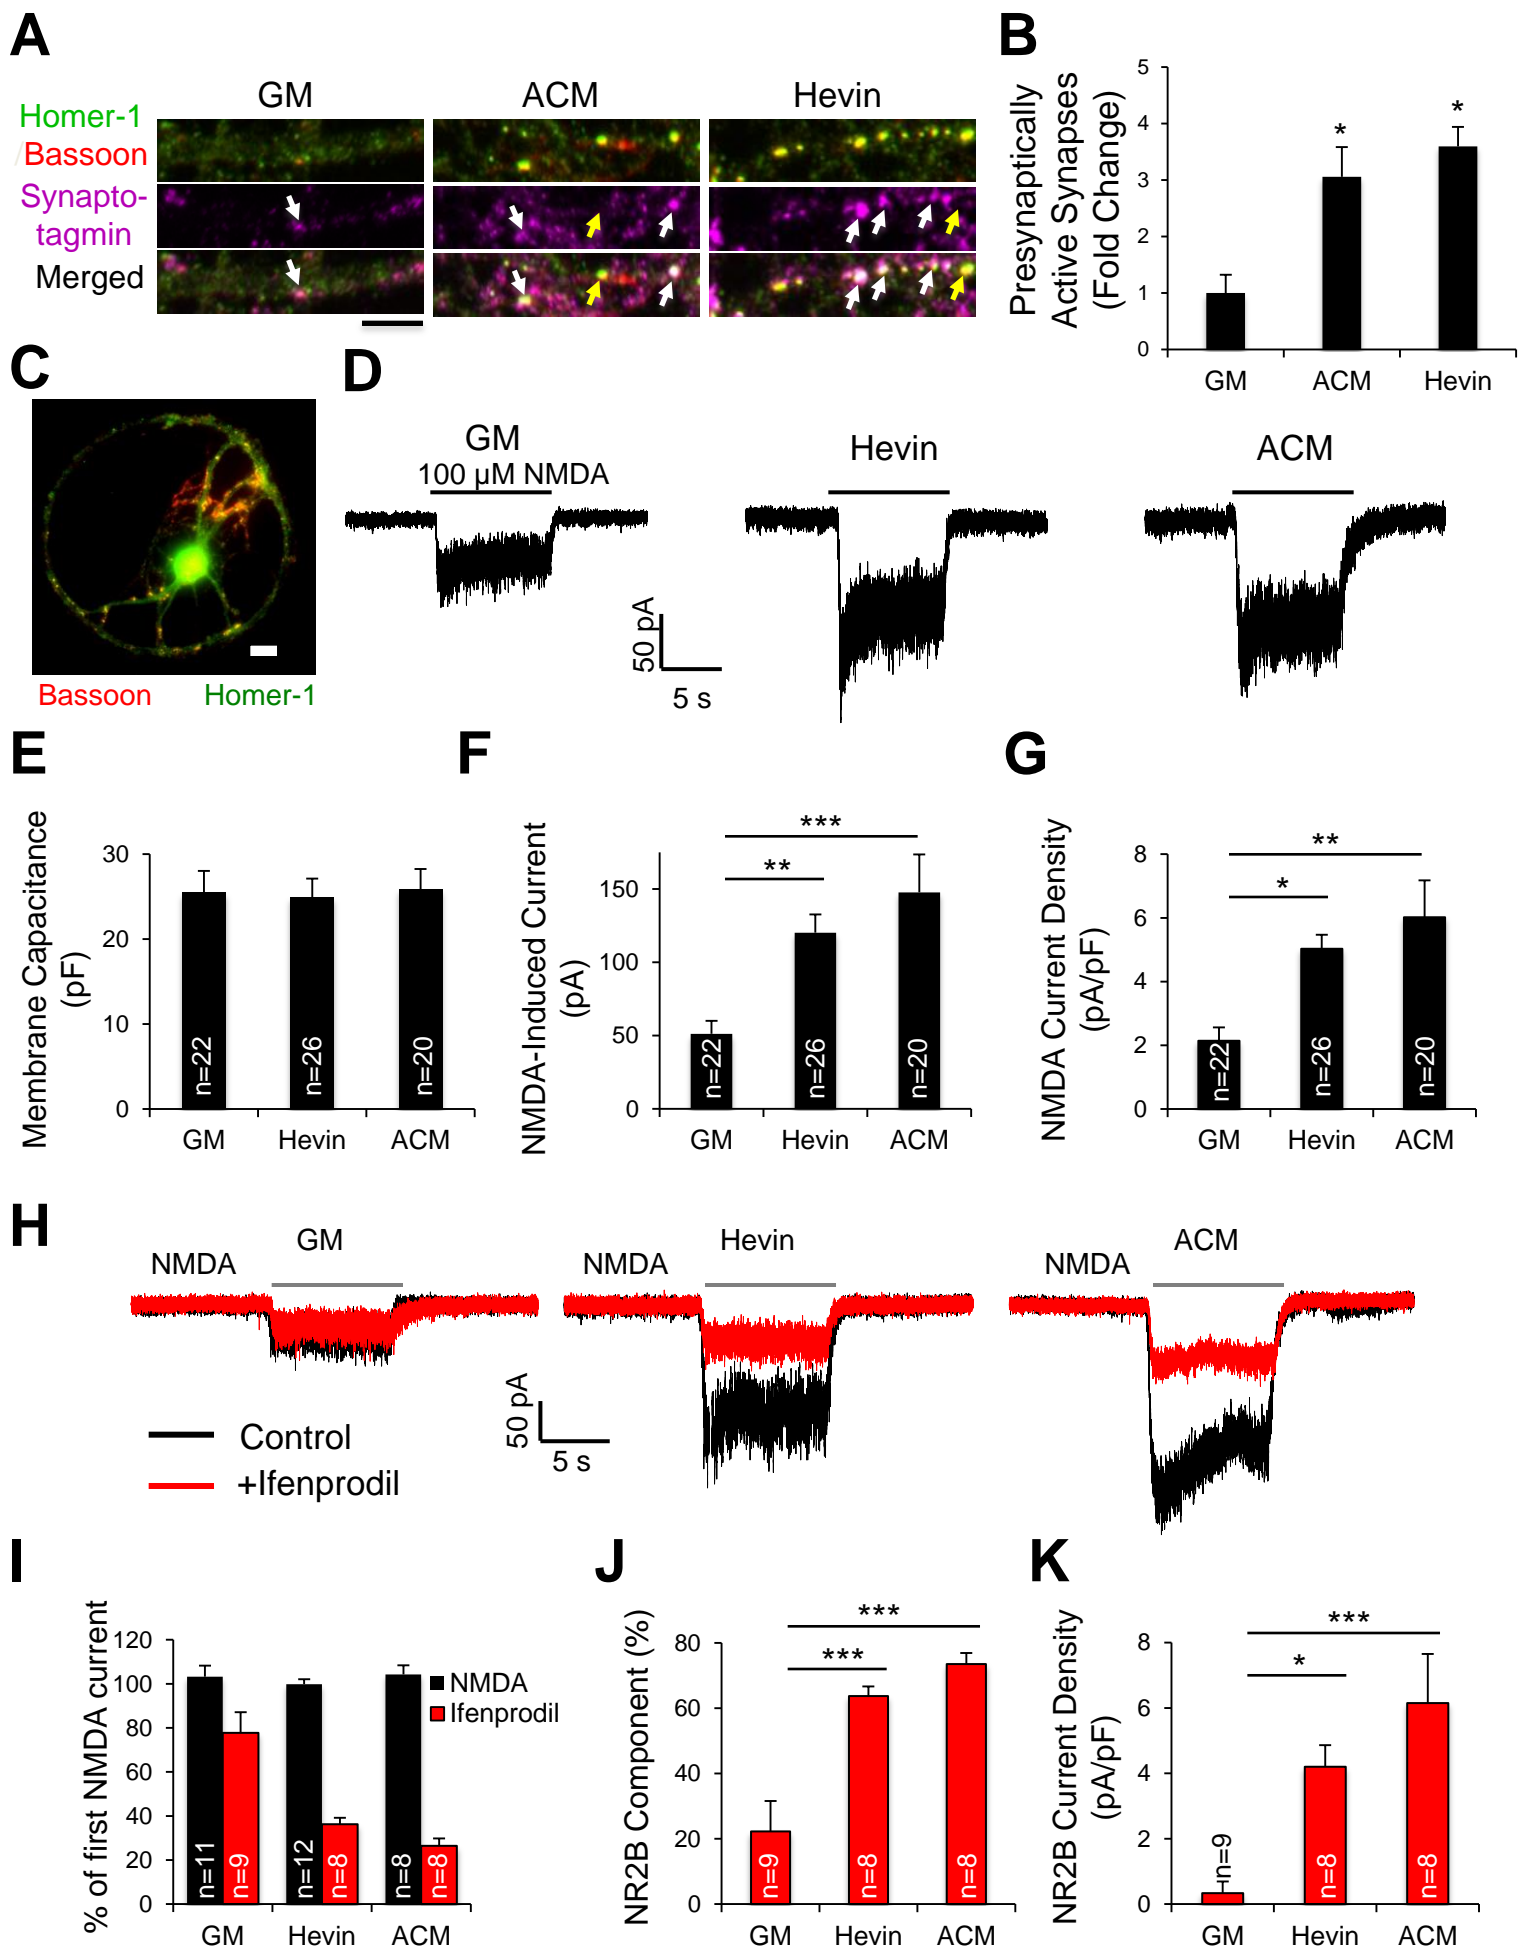

Supplement: NIHMS740070-supplement-3.pdf [file NIHMS740070-supplement-3.pdf]

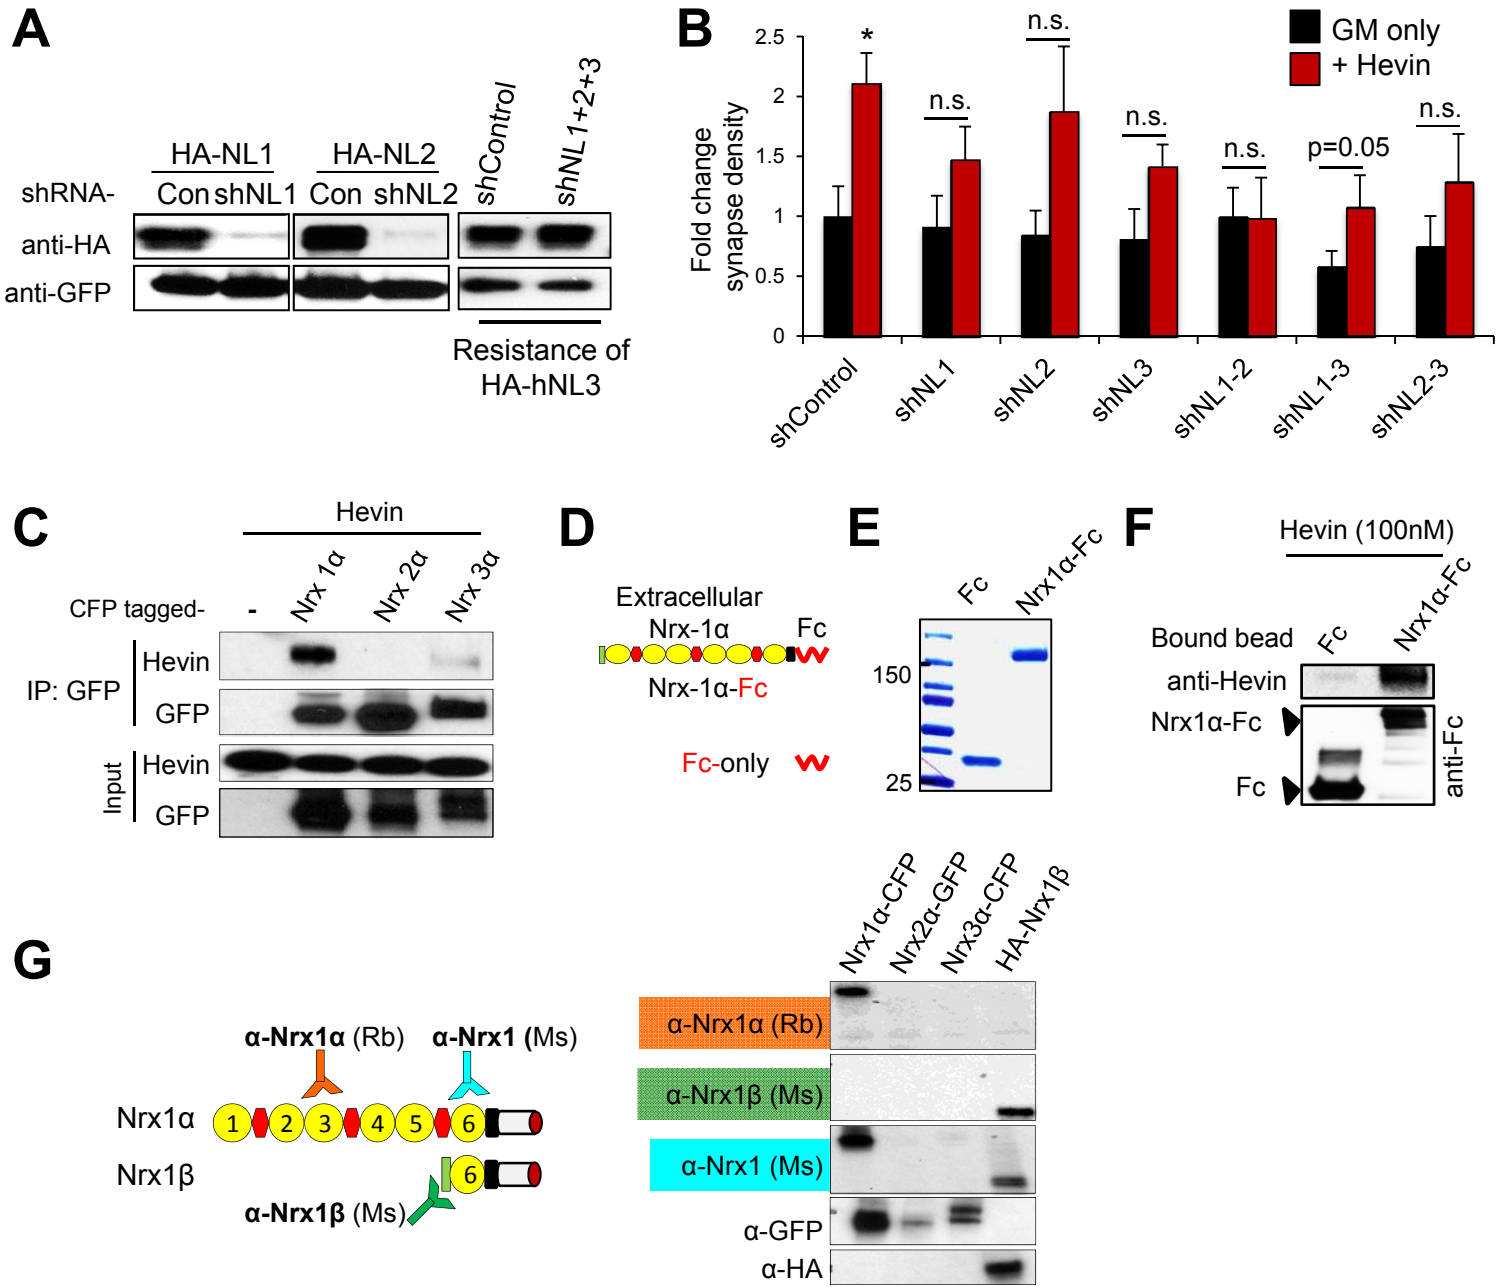

Supplement: NIHMS740070-supplement-4.pdf [file NIHMS740070-supplement-4.pdf]

**A**

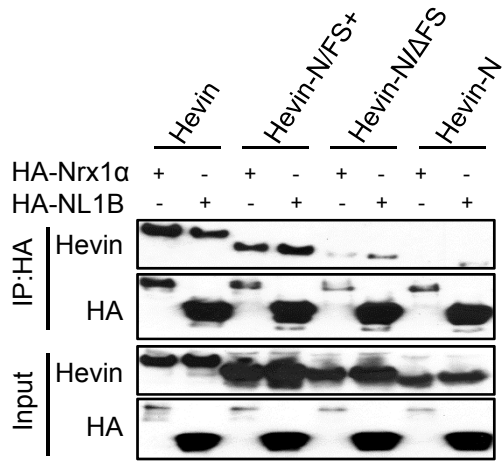

**B**

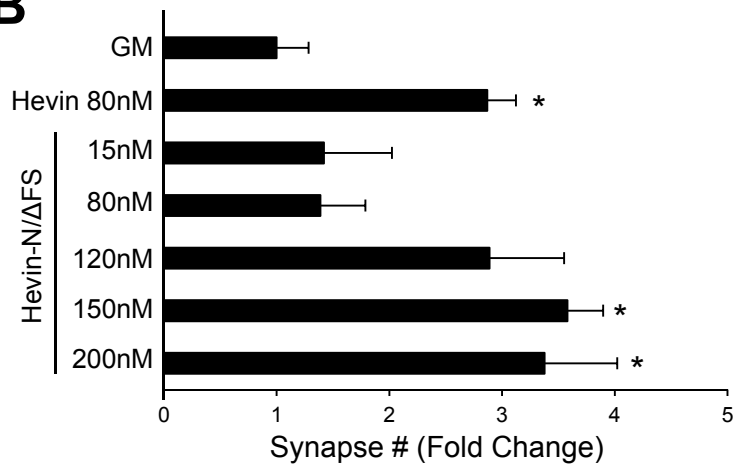

**C**

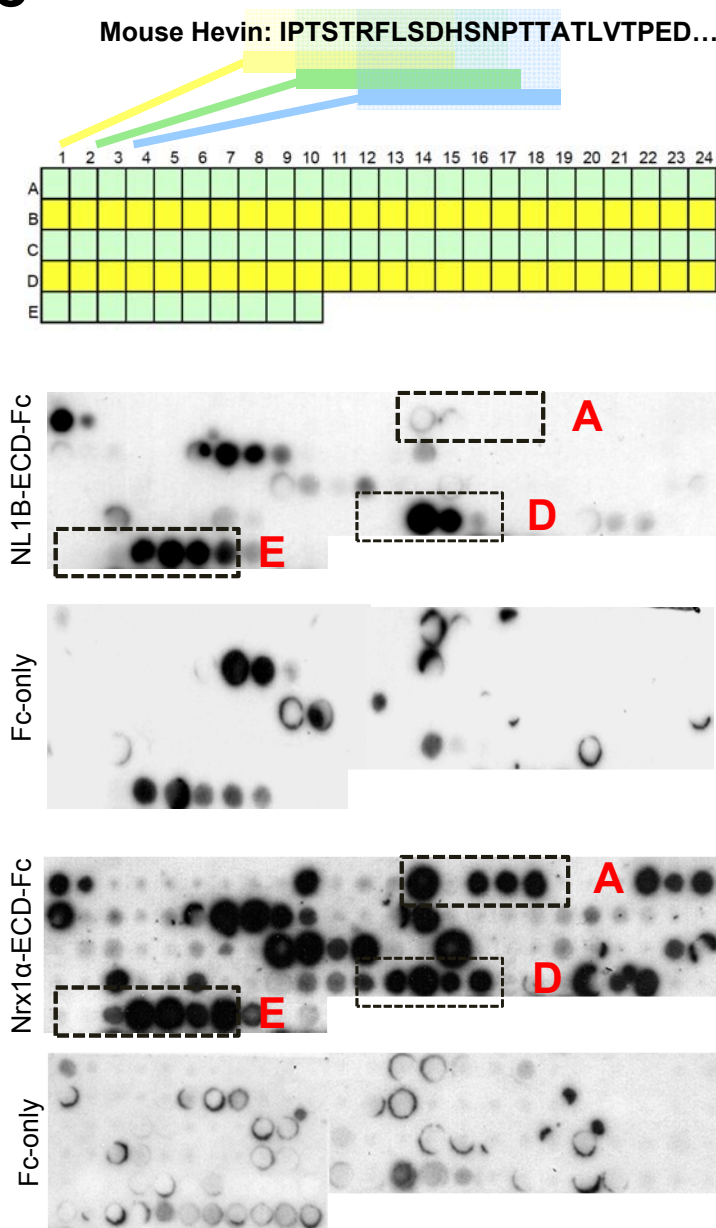

**D**

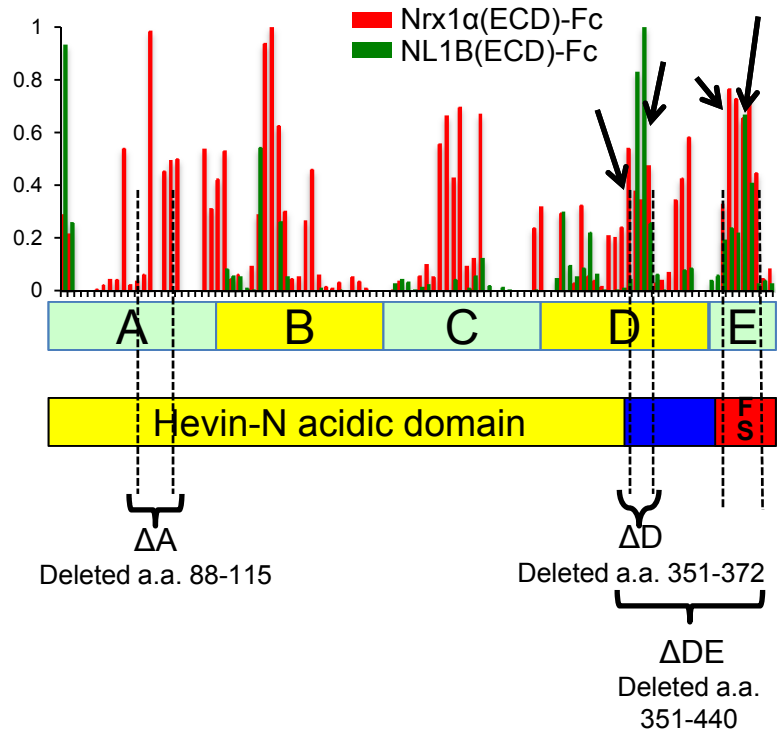

**E**

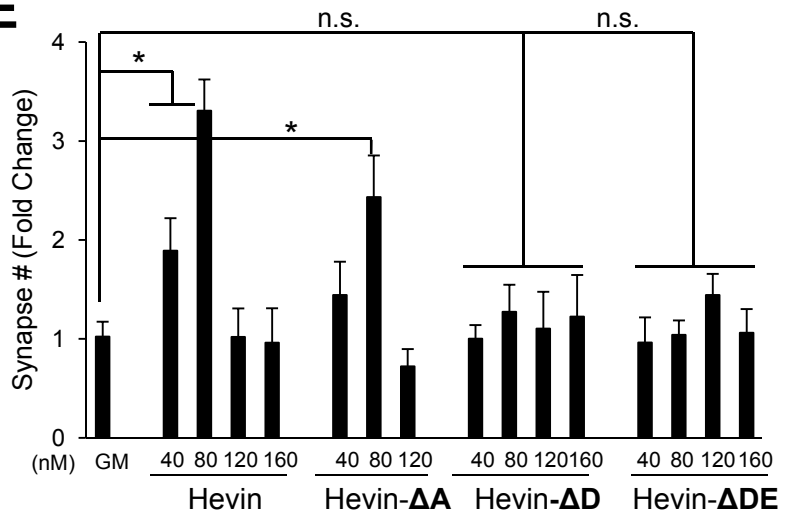

Supplement: NIHMS740070-supplement-5.pdf [file NIHMS740070-supplement-5.pdf]

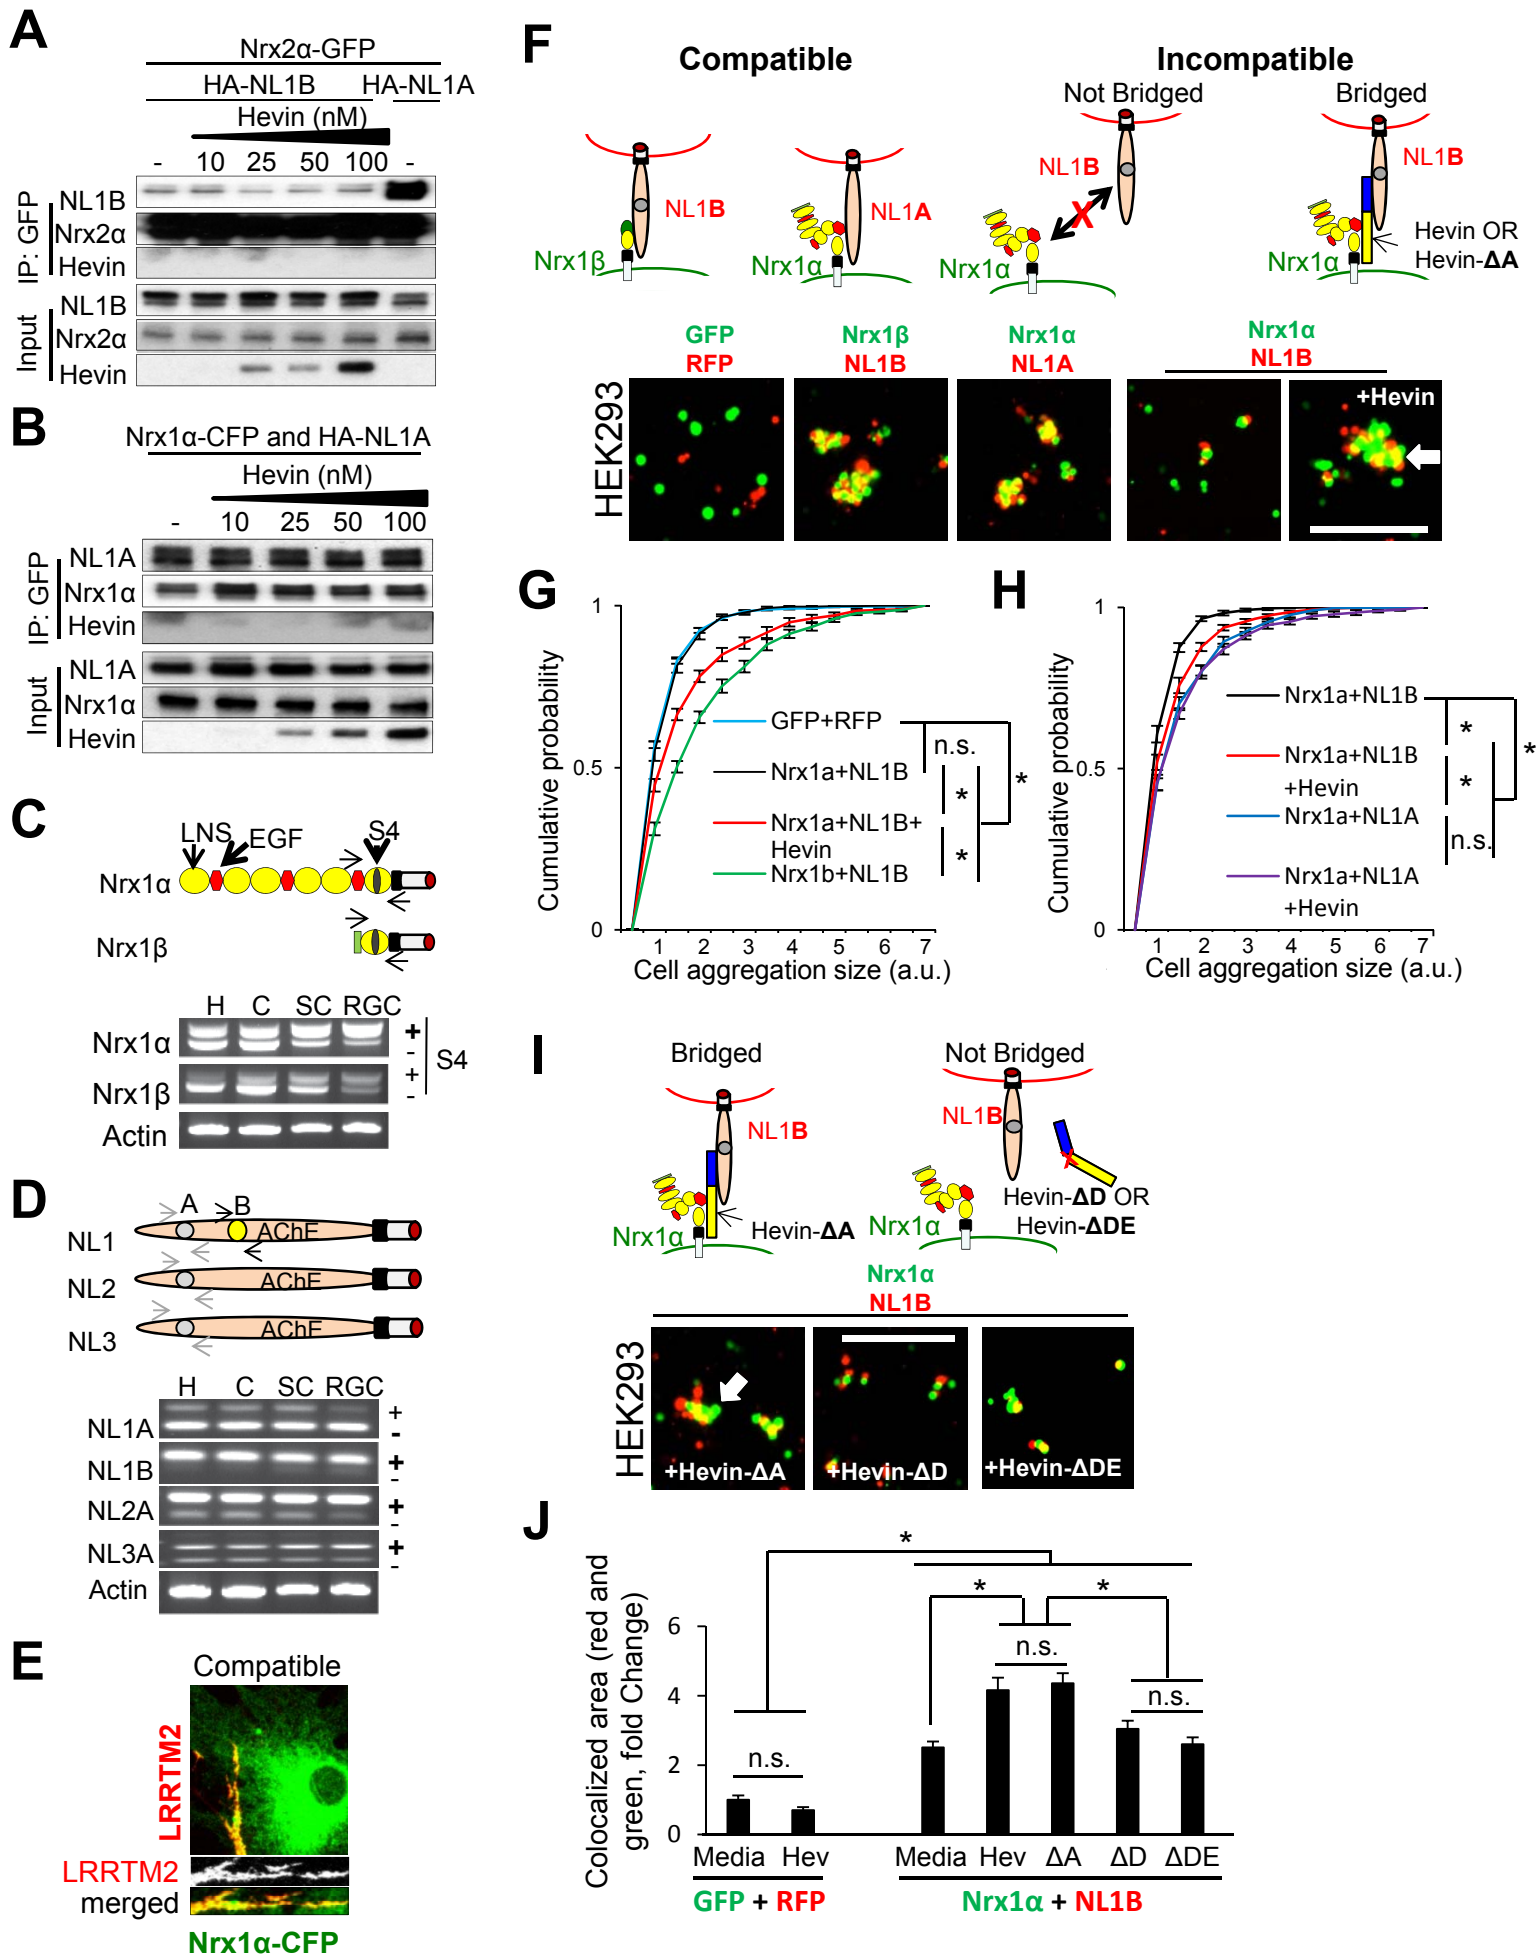

Supplement: NIHMS740070-supplement-6.pdf [file NIHMS740070-supplement-6.pdf]

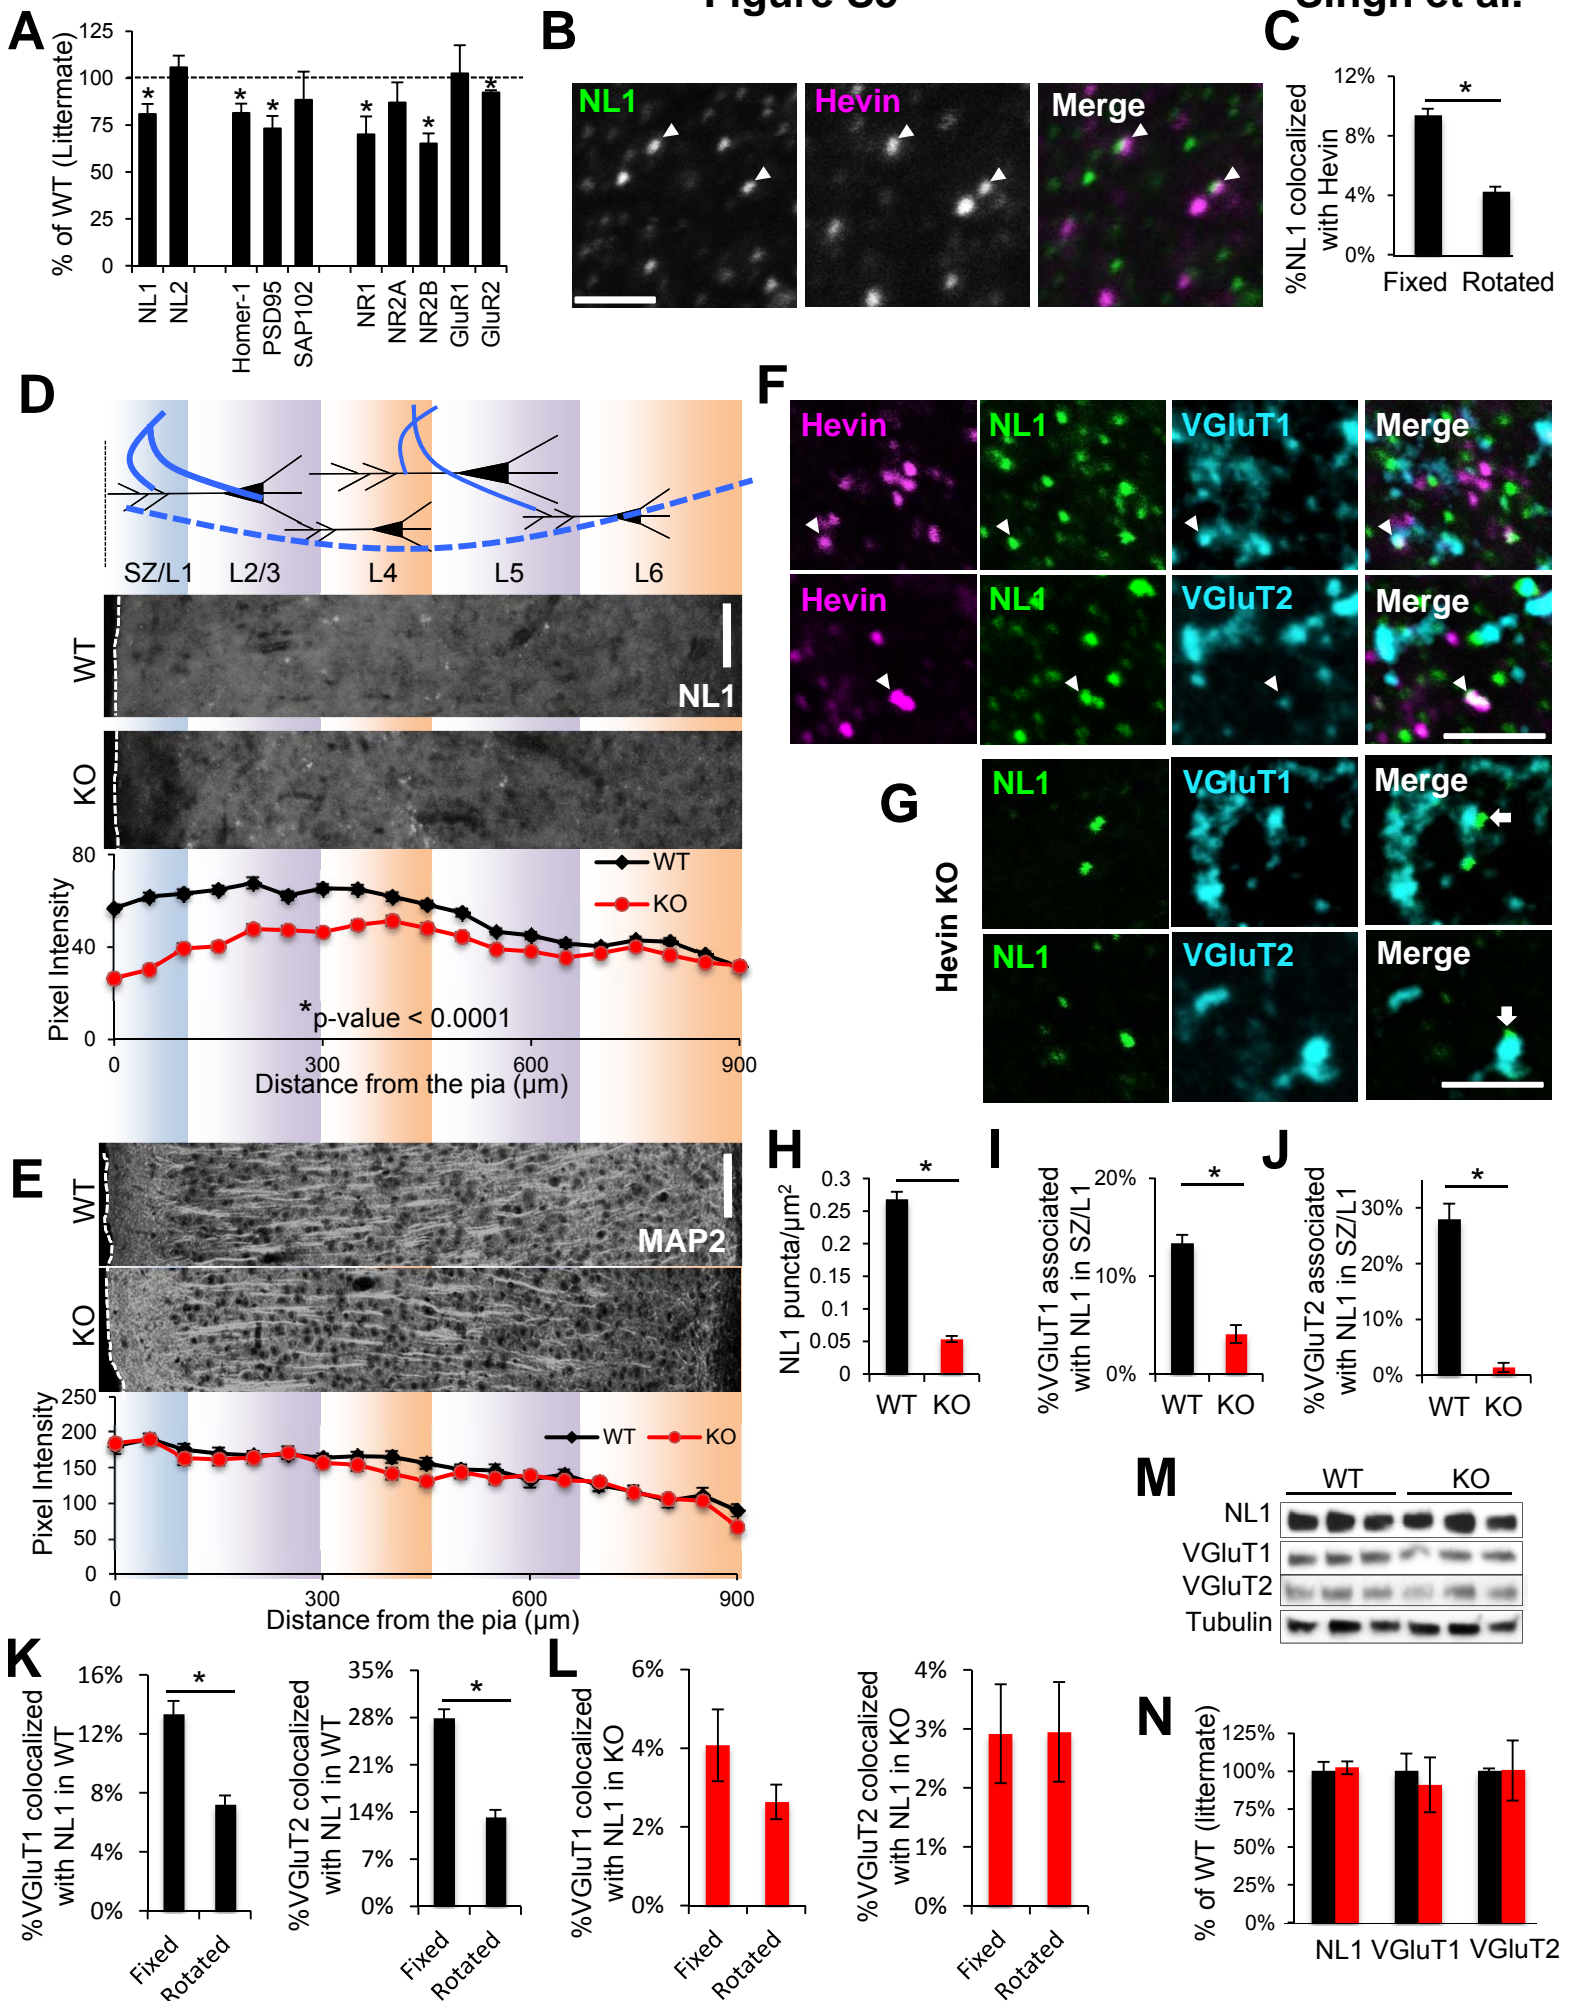

Supplement: NIHMS740070-supplement-7.pdf [file NIHMS740070-supplement-7.pdf]

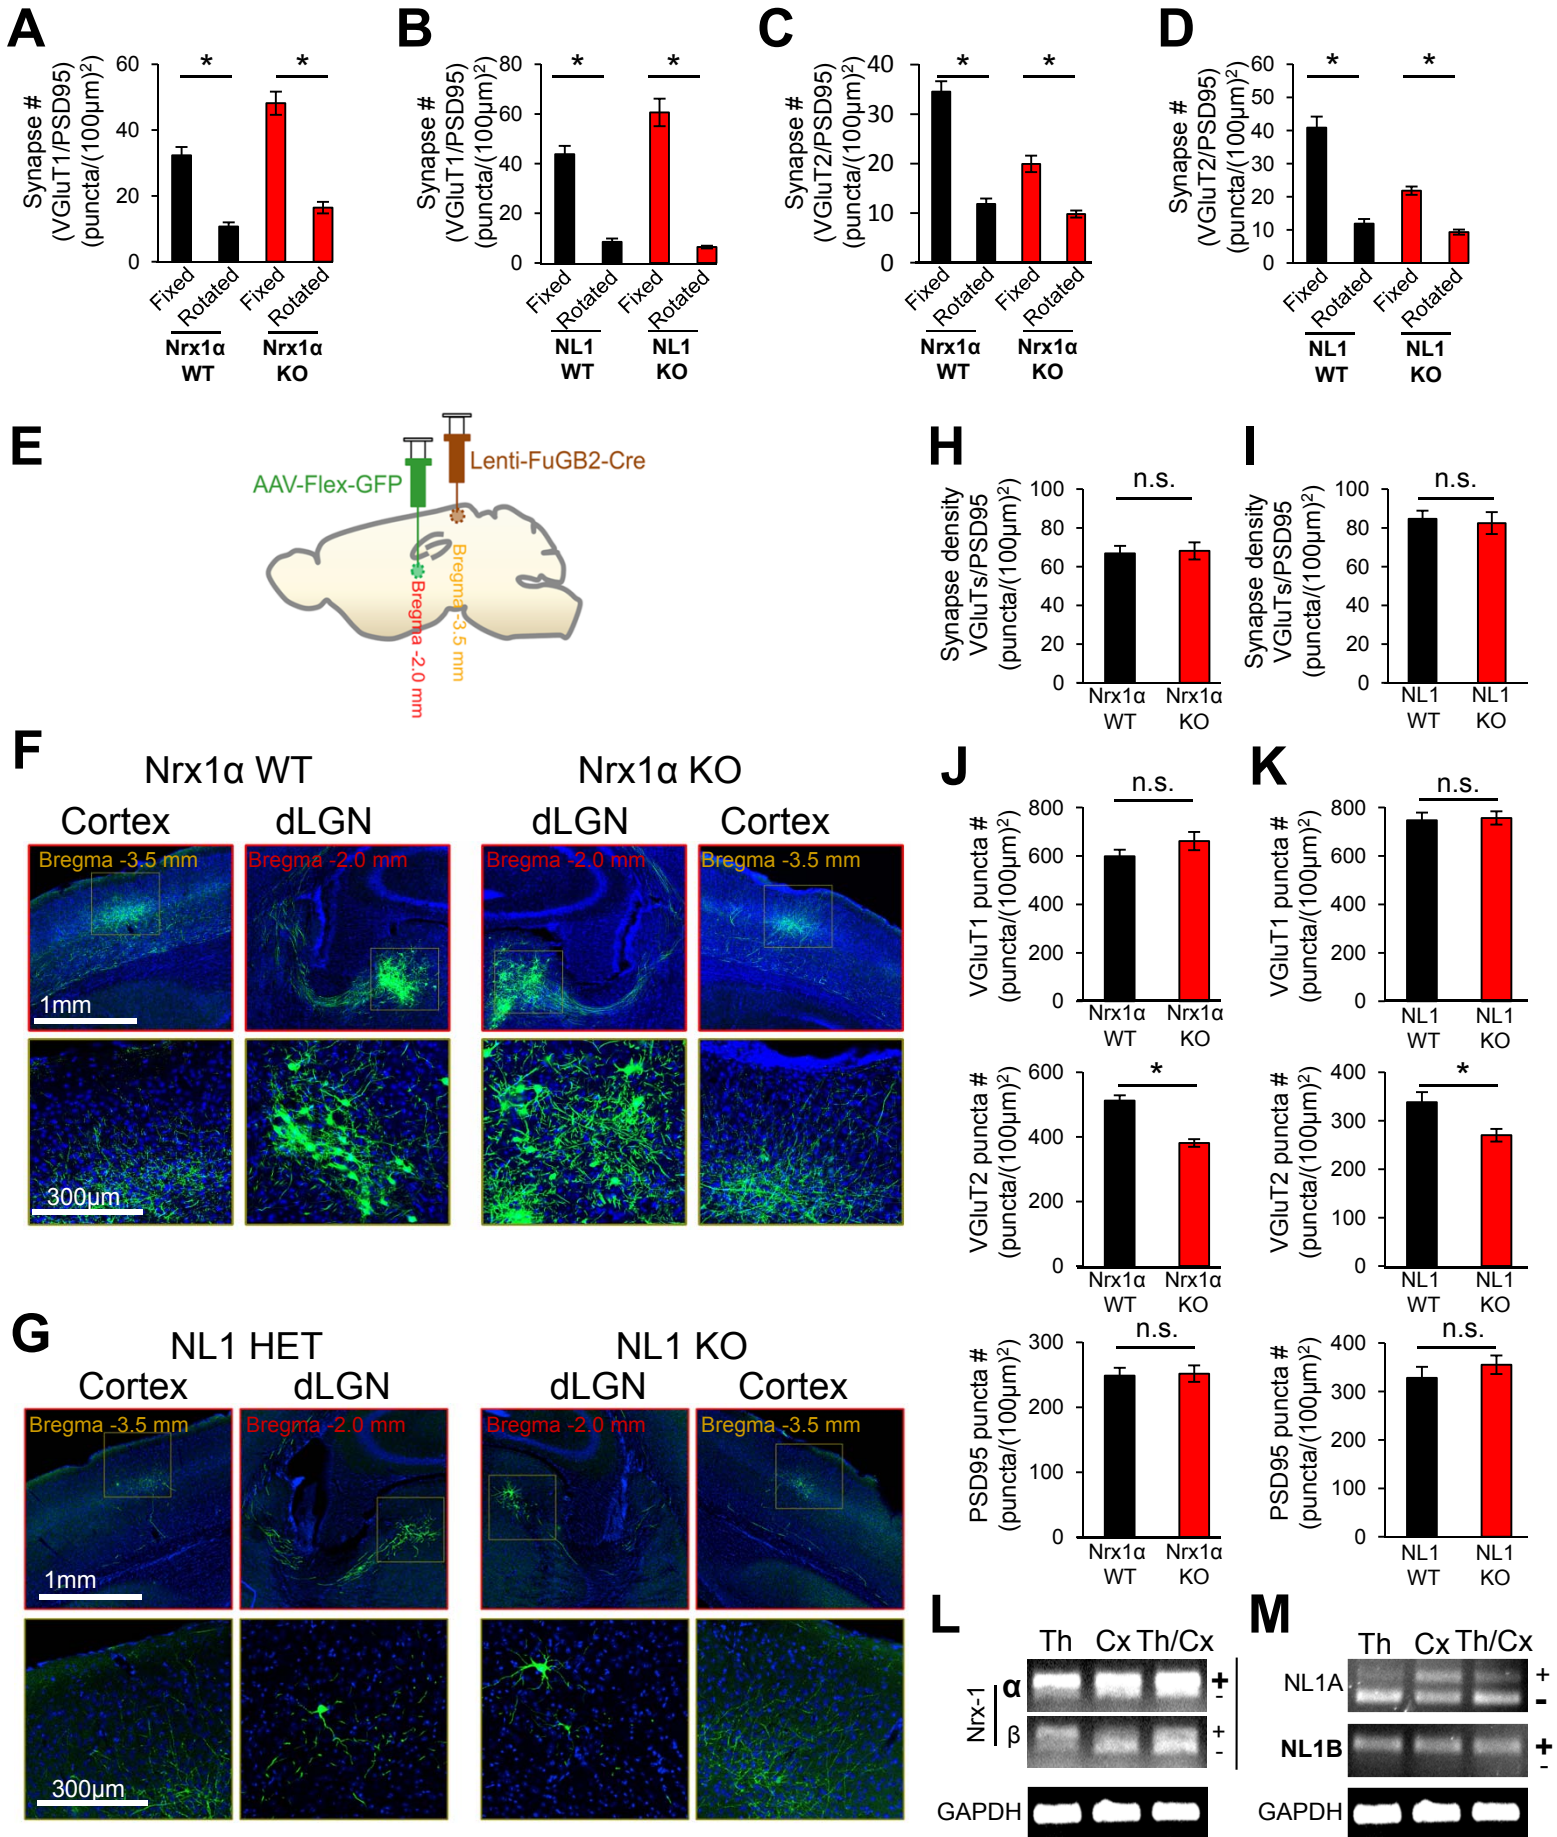

Supplement: NIHMS740070-supplement-8.pdf [file NIHMS740070-supplement-8.pdf]

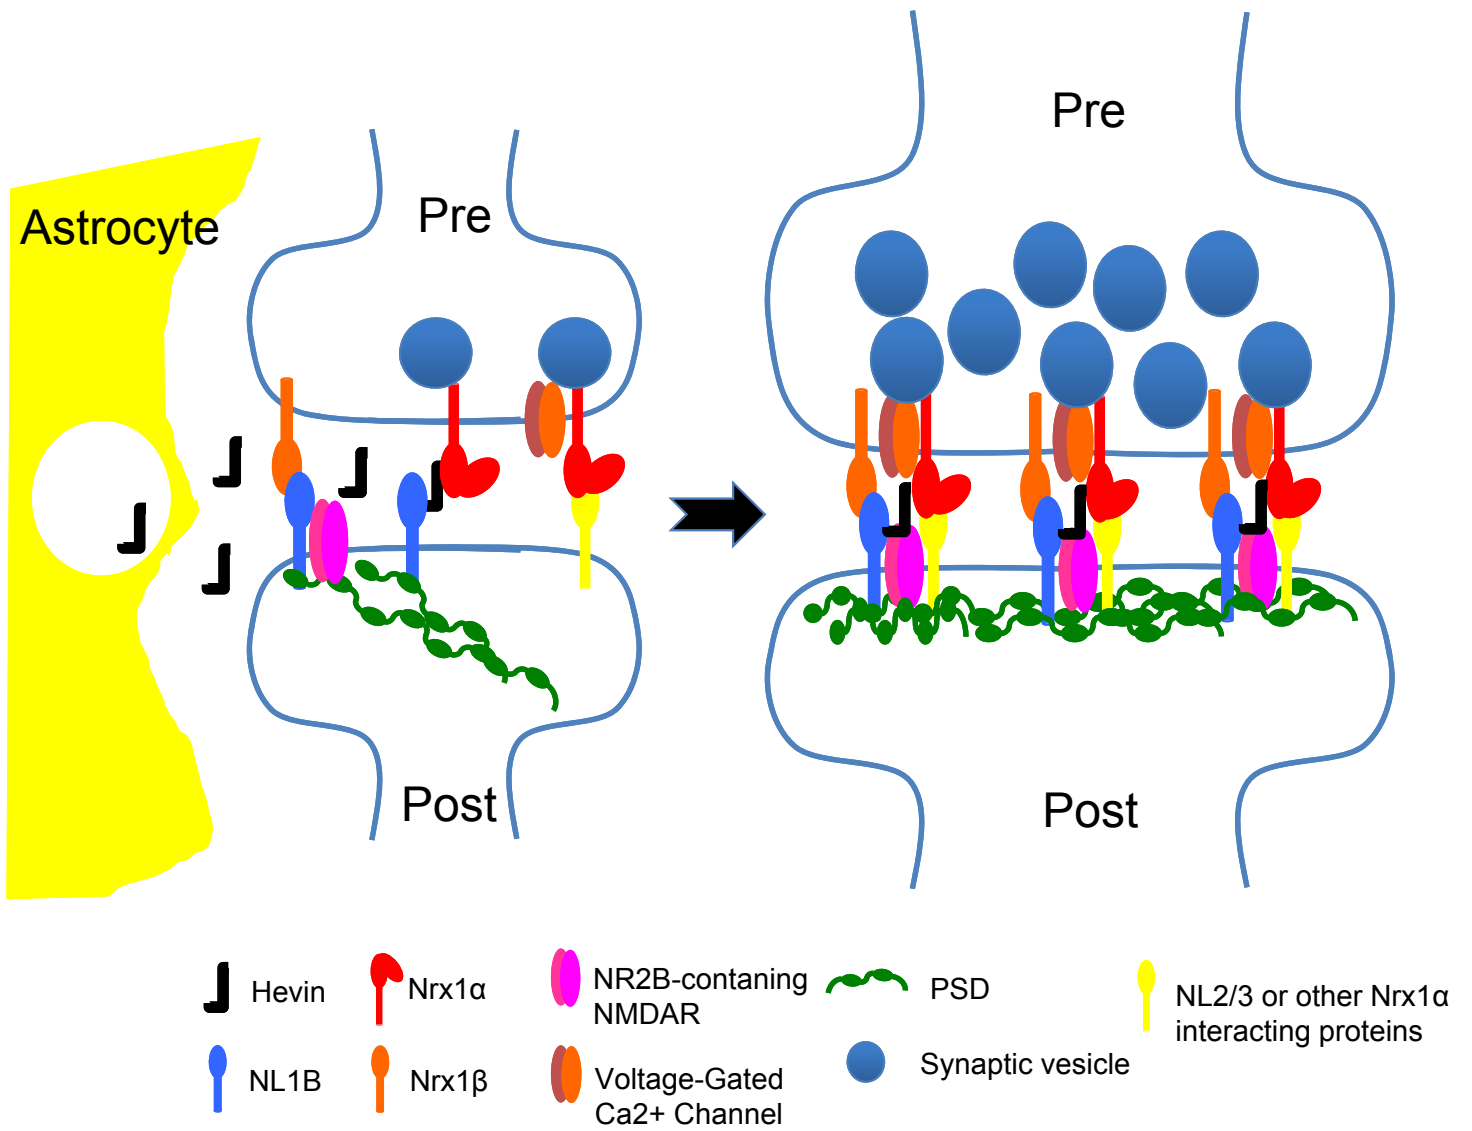

Supplement: NIHMS740070-supplement-9.pdf [file NIHMS740070-supplement-9.pdf]
